# Supplementary material
Source: publisher figshare collection journal article supplement (https://tandf.figshare.com/ndownloader/files/13729568)
Supplement: Supplementary file 1 [file 13729568]

**Supplement 2. Examined specimens of *Thymus jankae* from the Balkans and *Th. praecox* subsp. *praecox* from Central Europe (* – specimens sampled for morphological study; labels are cited in their original language, preserving old geographic names).**

***Thymus jankae***Čelak.

**Original material:** **ROMANIA. Caraș-Severin county:** auf Felsen bei Csiklova, 25 May 1838, *P. Wierzbicki s.n.* ut “*Thymus humifusus*”(PR No. 187633 – lectotype [digital image])*; in rupibus calcareis alvei “Proláz” ad ped. m. Domugled prope Thermas Herculis, Banatus austro-orientalis, 18 June 1870, *V. Janka s.n.* (PR barcode PR 746210 – syntype [digital image]).

**Other specimens: BOSNIA AND HERZEGOVINA. Zenica-Doboj canton:** in pinetis (*P. nigra*) montis Tajan agri fluminis Gostović, solo serpentino, 1280 m, 06 June 1921, *K. Malý 289* (W-Ronniger No. 1997-0001103 [digital image])*; **Central Bosnia canton:** in monte Vlasić, July-August 1892, *E. Brandis s.n.* (P barcodes P03400376*, P03400377* [digital images]); Vlasić pr. Travnik, August 1893, *E. Brandis s.n.* (P barcode P03400373 [digital image]); Paljenik, Vlašić, 19 July 1886, *E. Brandis s.n.* (PR No. 377163 [digital image])*; **Sarajevo canton:** Sarajevo, s.d., *J. Futák s.n.* (SAV)*; Stari grad b. Sarajevo, s.d., *F. Fiala s.n.* (CHER); **East Sarajevo:** Jahorina planina,in silvis petrosis prope Pračko vrelo, sol. calc., 1480 m, 14 July 1921, *K. Malý 287* (W-Ronniger No. 1997-0001110 [digital image])*; montes Gola Jahorina, Pogledine – Krvava Lokva, in pratis subalpinis, solo calcareo, ca. 1800–1850 m s.m., 03 August 1962, *B. Pawłowski s.n.* (KRAM No. 325796); in saxosis calcareis montis Trebović, c. 700 m, May 1885, *G. Beck s.n.* (P barcodes P03400372*, P03400375* [digital images]); **Višegrad municipality:** Višegrad, Vardiště, hadcové, lesnaté svahy, ca. 850 m, 30 May 1967, *J. Dvořák s.n.* (BRA); **REPUBLIC OF SERBIA. Pirot district:** Poganov[o], 1901, *A. Tošev s.n.* (CHER)*; **ROMANIA. Caraș-Severin county:** Golopencza, Herkulesbad, 1907, *C.K. Schneider s.n.* (CHER); in saxis calcareis ad Domugled, prope Herkulesfürdő, 22 June 1905, *S. Mágócsy-Dietr, G. Lengyel s.n.* (BP No. 551240); Herkulesfürdő, ad m. Domugled, in saxosis, 26 June 1905, *J. Tuzson s.n.* (BP No. 551356); Domuglad, skała wapienna, 02 June 1931, *A. Kozłowska s.n.* (KRAM No. 019728); Banatus, Domugled, in pratis, solo calcareo, ca. 1080 m, 02 August 1931, *B. Pawłowski s.n.* (KRAM No. 332660); in formiceto […], Herkulesfürdő, 11 June 1918, *K. Lyka s.n.* (BP No. 472705); in rupestribus ad Thermas Herculis, June 1896, *A. Degen s.n.* (BP No. [?]); in saxis supra Thermas Herkulis, 02 June 1887, *A. Degen s.n.* (BP No. 233699*; CHER); in monte Domugled supra Thermas Herkulis, 02 June 1887, *A. Degen s.n.* (P barcode P03886171 [digital image])*; in cacumine montis Domugled ad Thermas Herkulis, alt. c. 1500 m, 02 June 1887, *A. Degen s.n.* (BP No. 233694, 233695); in rupestribus montis Domugled ad Mehadcam, June 1887, *J. Bornmüller s.n.* (BP No. 336614); in monte Domugled ad Thermas Herculis, June 1889, *V. Borbás s.n.* (BP No. 336615); Băile Herculane, kamenité svahy pod vrcholem hory Domugled, ca. 1050 m, 29 June 1970, *J. Dvořák s.n.* (BRA); Băile Herculane, vápencové skály na vrcholu hory Domugled, ca. 1150 m, 29 June 1970, *J. Dvořák s.n.* (BRA)*; Băile Herculane, vápencové skály při výstupu na horu Domugled, ca. 800 m, 04 May 1971, *J. Dvořák s.n.* (BRA); in montibus ad Thermas Herculis, 16 July 1885, *V. Borbás s.n.* (BRA)*; Băile Herculane, vápencové skály v sotězce nad campingem, ca. 700 m, 03 May 1971, *J. Dvořák s.n.* (BRA); in montibus ad Thermas Herculis, 188[?], *V. Borbás s.n.* (BP No. 233698); Herkulesbad, auf Felsen in der Prolaszschlucht, 300 m, 28 May 1895, *C. Baenitz s.n.* (LW No. 113097; P barcodes P03400370*, P03400371*, P03886172*, P04436516, P04436519 [digital images]); in saxosis supra Thermas Herculis, 27 June 1895, *A. Degen s.n.* (BP No. 701916); in saxosis calcareis ad Thermas Herkulis, 17 June 1899, *L. Thaisz s.n.* (LW No. [?]); Domogled, June 1895, *L. Thaisz s.n.* (BRA); in monte Domugled ad Thermas Herculis, 09 June 1895, *L. Thaisz s.n.* (BRA)*; in rup. montis Domugled ad Thermas Herculis, 12 June 1911, *N. Filarszky, S.* *Jávorka s.n.* (BP No. 551351)*; Domogled hegy, Herkulesfürdő, Krassósz, 15 June 1932, *L. Vajda s.n.* (BP No. 283910)*; Domogled nad Băile Herculane, July 1928, *V. Nábĕlek s.n.* (SAV); Transilv. Alpy, Domogled (Băile Herculane), July 1928, *V. Nábĕlek s.n.* (SAV)*; in rupibus cacuminis montis Arjana, ad pagum Globureu, alt. cca 1500 m s.m., solo calc., 23 June 1930, *E. Nyárády s.n.* (P barcode P04436517 [digital image])*; in cacumine montis Surduluj ad Thermas Herculis, 14 June 1890, *L. Thaisz s.n.* (BRA)*; in rupibus calcareis montis “Alte Roll” supra pag. Csiclova, alt. ca. 800 m. s. m., 10 June 1916, *S. Jávorka s.n.* (BP No. 219072, 453098); in saxo calcareo altissimo supra monasterium ad pag. Csiklova ad latus montii “Alte Roll”; alt. 800 m, 10 June 1916, *S. Jávorka s.n.* (BP No. 233704); Karán-szoros, 17 June 1932, *L. Vajda s.n.* (BP No. 283912)*; **BULGARIA. Shumen province:** Šumen, 1902, *H. Šcorpil s.n.* (CHER; W No. 1991-0001748*); Madara, 1907, *J. Bornmüller s.n.* (CHER); **Veliko Tarnovo province:** Elensky Balk[an], 1899, *I.K. Urumoff s.n.* (CHER); **Stara Zagora province:** in monte “Šipka-Balkan” pr. Kalofer, 05 August 1893, *J. Wagner s.n.* (P barcodes P03400368, P03400369*, P04436518 [digital images]); **Plovdiv province:** montes Sredna Stara planina, in pratulis silvaticis ad semitam ex Kalofer ad casam alpinam Raj ad pedem montis Botev (antea Jumrukčal), 1100 m s.m., 12 July 1972, *F. Černoch s.n.* (BRA); **Sofia province:** Rila planina, Damha, ca. 2500 m, July 1930, *V. Nábĕlek s.n.* (SAV); Riła Planina, pn zbocza Musała, murawy powyżej schroniska, Hiża Musała na wys. 2400–2480 m, 09 August 1965, *A. Jasiewicz s.n.* (KRAM No. 228309, 411457); Riła Planina, otoczenie schroniska Hiża Musała, murawy na skałach krystalicznych na wys. 2400–2560 m, 09 August 1965, *A. Jasiewicz s.n.* (KRAM No. 228311, 411455); in m. Rilo, m. Musala, August 1897, *V. Střibrny s.n.* (P barcode P03400374 [digital image])*; **Kyustendil province:** Rila planina, Skakavica, ca. 2000 m, July 1929, *V. Nábĕlek s.n.* (SAV); Rila planina, Kabul (Skakavica), July 1930, *V. Nábĕlek s.n.* (SAV)*; **Blagoevgrad province:** vallis Banderica, pars suprema, versus niguus inter vallem et vallem Domianica, *Festucetum validae*, 2500 m, solo granitico, 21 August 1948, *B. Pawłowski s.n.* (KRAM No. 325794);montes Pirin, supra lacum Gorne Banderiško Ozero, in graminosis granitis, 2320 m, 21 August 1948, *B. Pawłowski s.n.* (KRAM No. 325795, 447194*); Pirin, pars merid., in pascuis alpinis […], ca. 2096–2000 m s.m., 17 September 1967, *J. Kollár s.n.* (BRA); Piryn, skały wapienne na pd. sboczach Wichrenu na wys. ok. 2700 m, 18 August 1961, *A. Jasiewicz s.n.* (KRAM No. 447195, 447196); **Smolyan province:** Rodopy, Smoljan, suche wapienne zbocza nad kamieniołomem na wschód od miasta, 05 August 1965, *A. Jasiewicz s.n.* (KRAM No. 411456); Rodopy Pd., skały wapienne w wąwodzie Trigradzkim koło Smolianu, 04 August 1965, *A. Jasiewicz s.n.* (KRAM No. 228305, 411752, 411753); **REPUBLIC OF** **MACEDONIA. Mavrovo and Rostuša municipality:** Planina Bistra, Maskarevac, in rupestribus calcareis graminosis, 2045 m s.m., 23 July 1923, *S. Pawłowska, B. Pawłowski s.n.* (KRAM No. 325793); **Novaci municipality:** distr. Edessa (Vadena)**,** montes Kaimakčalan, in saxosis regionis alpinae, ca. 2200–2500 m, 28 July-03 August 1932, *K. Rechinger 3153* (K barcode K001070016 [digital image])*; **ALBANIA:** Jabloniza, 1800 m, Alban[ia], 1908, *I. Dimonie s.n.* (CHER).

***Thymus praecox*** Opiz subsp. ***praecox***

**Original material:** **CZECH REPUBLIC. Prague:** In rupestribus Troja Praga adjacentibus, s.d., *J. Masner* *s.n.* (JE barcode JE00002513 – lectotype [digital image]).

**Other specimens: GERMANY. Saxony-Anhalt state:** Galgenberg bei Koesen, 10 May 1904, *Sagorski s.n.* (LW No. 115323); Galgenberg bei Koesen, auf Kies, 02 May 1908, *Sagorski s.n.* (LW No. 115322); Koesen, in arenosis ad Galgenberg, 05 May 1911, *Sagorski s.n.* (LW No. 115332); Sandgruben bei Koesen, 20 May 1904, *Sagorski s.n.* (LW No. 115324); Rettel bei Freiburg, 21 May 1904, *Sagorski s.n.* (LW No. 115325); **Bavaria state:** Eichstätt, Willibaldsburg, 14 June 1929, *M. Machule s.n.* (P barcode P04060833 [digital image])*; München (Perlacher Forst, in graminosis), 15 June 1957, *M. Machule s.n.* (P barcode P03556881 [digital image])*; dolina Isar, Tölz, 655 m, 28 September 1897, *B. Kotula s.n.* (KRAM No. 054756); dolina Isar, lewy brzeg, Krün, 02 October 1897, *B. Kotula s.n.* (KRAM No. 054758); dolina Isar, lewy brzeg, Mittenwald, 03 October 1894, *B. Kotula s.n.* (KRAM No. 054757); n / Mangfall, Thalmühle, 17 June 1898, *B. Kotula s.n.* (KRAM No. 055047); Weissachtal, Ach, 16 June 1898, *B. Kotula s.n.* (KRAM No. 055046)*; **SWITZERLAND. Bern canton:** na halach alpejskich pd. wsch. stoków Hinter Zinggenstock pod granitowymi skałami, ok. 2400 m n.p.m., Oberaarsee, 09 August 1972, *J. Mądalski 32854* (KRAM No. 497272); **Valais canton:** Gr. St. Bernard, ca. 2500 m, 07 August 1926, *V. Nábĕlek s.n.* (SAV); Schwarzsee bei Zermatt, 2600 m n.p.m., 24 September 1966, *K. Zarzycki s.n.* (KRAM No. 263192); wzgórza kserotermiczne pod Branson koło Martigny, 14 July 1973, *A. Jasiewicz s.n.* (KRAM No. 411757, 411758); wzgórza wapienne pod zamkiem Tourbillon koło Sion, 14 July 1973, *A. Jasiewicz s.n.* (KRAM No. 411759, 411760, 411761); **Grisons canton:** na stromej skałce przy szosie, ok. 2220 m n.p.m., Alpy Albula, La Veduta na Julierpass, 19 July 1967, *J. Mądalski 29887* (KRAM No. 497281, 497282); na przydrożu obok szosy ok. 1 km na pn. wsch. od miejscowości Unter Engadin, Crusch koło Ramosch nad Innem, 20 July 1967, *J. Mądalski 29972* (KRAM No. 497263, 497264); pd. stoki Pic Valletta u wylotu doliny Val d’Angel koło Julierpass, ok. 2200–2400 m n.p.m., Bivio, 18 July 1972, *J. Mądalski 32355* (KRAM No. 497276, 497277); zbocza między przełęczą San Bernardino a dol. Hinterrhein, murawy na wys. 1750 m, 23 July 1973, *A. Jasiewicz s.n.* (KRAM No. 411464); Sagens koło Bonaduz, las sosnowy *Erico-Pinetum* na wys. 850 m, 24 July 1973, *A. Jasiewicz s.n.* (KRAM No. 411632)*; **ITALY. Trentino-Alto Adige/Südtirol region:** Massif de l’Ortler, Versant E. du Col du Stelvio, en aval de l’Hôtel Sotto, alt. 2100 m, 21 July 1959, *G. Didier 3084* (P barcode P01049672 [digital image])*; **Veneto region:** valle Revolto (Verona), 15 June 1973, *Michalko s.n.* (SAV); **SLOVENIA. Preddvor municipality:** Kokra, 600 m s. m., August 1938, *K. Ptačovský s.n.* (SAV); **Logatec municipality:** Logatec, krasovi porosty, June 1932, *K. Ptačovský s.n.* (SAV); **AUSTRIA. Upper Austria state:** Mitterweissenbach, 18 May 1920, *s.c.* (CHER); Strobl, 2, Ischl, June 1916, *s.c.* (CHER); **Vienna:** južne od Viedne, 01-02 August 1964, *J. Futák s.n.* (SAV); Kalenberg, 03 August 1916, *s.c.* (CHER); **Lower Austria state:** auf Grasplätzen bei Perchtoldsdorf, 01 June 1881, *E. Witting s.n.* (LW No. 113002); Branusberg bei Hainburg, 12 May 1887, *[?] s.n.* (BRA); Lengenfeld bei Krems, Sirnitztal, 19 May 1934, *K. Ronniger s.n.* (P barcode P04060746 [digital image])*; Baden bei Wien, June 1884, *E. Wołoszczak s.n.* (KRAM No. 184016); Kalvarienberg bei Baden, 1832, *Winkler s.n.* (LW No. 115326); Kalvarienberg ad Baden, 19 May 1886, *K. Richter s.n.* (LW No. 114158); in monte Calvarienberg ad oppidum Baden, 02 June 1894, *H. Braun s.n.* (BRA); Baden, 03 July 1917, *R. Beck s.n.* (CHER); Gras-Orte Mitterberg bei Baden, 05 June 1881, *G. Kornhuber s.n.* (BRA); Richtberg bei Baden b. W., 13 May 1934, *K. Ronniger s.n.* (P barcode P04060716 [digital image])*; zwischen Gumpoldskirchen und Pfaffstätten, Heberlberg, 13 May 1923, *K. Ronniger s.n.* (P barcode P04060710 [digital image])*; in ditione Gloggnitzensi, Adlitzgraben, 01 July 1887, *K. Richter s.n.* (LW No. 113096); auf dem Kalenderberg bei Mödling, 14 May 1882, *E. Witting s.n.* (LW No. 114160); in ditione Mödlingense, 30 May 1891, *K. Richter s.n.* (LW No. 115366); Austria inferior, in rupestribus calcareis ad oppidum Moedling, 350 ms.m., s.d., *H. Braun s.n.* (BRA; CHER; KRAM No. 184112; P barcodes P04061749*, P04404117 [digital images]); Vordere Mandling ad Oed, in silva saxosa (*Pinus nigra*), solo dolomitico, ca. 400–500 m s.m., 11 June 1961, *S. Pawłowska, B. Pawłowski s.n.* (KRAM No. 336432, 337690); Schafberg, 20 June 1916, *s.c.* (CHER); Em[m]ersdorf b. Melk, 24 May [?], *Ipse* *s.n.* (CHER); steinige grasige Stellen, Wachsriegel des Sneeberges NO, 04 July 1912, *E. Woloszczak s.n.* (KRAM No. 184111)*; na pd. stockach wapiennego wzgórza, na pd. wsch. od wsi Hundsheim koło Deutsch Altenburg, 06 September 1972, *J. Mądalski 33071* (KRAM No. 497242); **Burgenland state:** Müllendorf, 05 May 1923, *K. Ronniger s.n.* (P barcode P04060815 [digital image])*; **Styria state:** Lokus Bachthal, 28 June 1889, *K. Richter s.n.* (LW No. 115365); ad Kraubath, 600–1000 m s.m., 18 July 1888, *[?] s.n.* (BRA); Hochschwab, 1893, *Resch s.n.* (SAV); in rupestribus et in glareosis vallis Gesäuse prope pagum Hieflau, solo calcareo, 580 m s.m., June 1905, *I. Glatz, G. Strobl s.n.* (KRAM No. 184113); **Carinthia state:** in valle Raiblense, 20 June 1891, *K. Richter s.n.* (LW No. 115307); **Tyrol state:** Jenbach, N, 540 m, 08 June 1898, *B. Kotula s.n.* (KRAM No. 055048);Jenbach, N, 535 m, 08 June 1898, *B. Kotula s.n.* (KRAM No. 055043); Jenbach, N, 515 m, 11 June 1898, *B. Kotula s.n.* (KRAM No. 055044); Valuga-Zürs., 2500 m, Kalc t., Arlberg, July 1939, *V. Nábĕlek s.n.* (SAV); k / Innsbruka, 700 m, 23 May 1894, *B. Kotula s.n.* (KRAM No. 055032); Müchlau k / Innsbruka, 16 June 1894, *B. Kotula s.n.* (KRAM No. 055031); Innsbruck, 16 June 1894, *B. Kotula s.n.* (KRAM No. 055030, 055034); Innsbruck, 720–750 m, 16 June 1894, *B. Kotula s.n.* (KRAM No. 055033); okolice Innsbrucka, Hafelekar, okolice Hottinger Alm, murawy na wys. 1500 m, 22 July 1980, *A. Jasiewicz s.n.* (KRAM No. 434019); Dolina Innu, k / Imst, 706–711 m, June 1896, *B. Kotula s.n.* (KRAM No. 055041); Dolina Innu, pravy brzeg k / Imst, 750–720 m, June 1896, *B. Kotula s.n.* (KRAM No. 055040); Dolina Innu, k / Hall, 02 June 1896, *B. Kotula s.n.* (KRAM No. 055028); Kalkkögele, zbocze Natters, 690 m, E, 07 July 1894, *B. Kotula s.n.* (KRAM No. 054942); Kalkkögele, Kolberg, W, 09 July 1896, *B. Kotula s.n.* (KRAM No. 054953); Kalkkögele, Sellraintal, 1110 m, 13 June 1895, *B. Kotula s.n.* (KRAM No. 054944); Kalkkögele, Sellraintal, 1090 m, 13 June 1895, *B. Kotula s.n.* (KRAM No. 054943); Solstein Kette, Höttingerschlucht, 26 May 1894, *B. Kotula s.n.* (KRAM No. 054960); Solstein – Kette, Höttinger Schlucht, 24 June 1894, *B. Kotula s.n.* (KRAM No. 054759); Solstein Kette, Höttinger Schlucht, 1000 m, 24 June 1894, *B. Kotula s.n.* (KRAM No. 054961); Solstein Kette, Wörgel Schlucht, SW, 1640 m, 14 July 1894, *B. Kotula s.n.* (KRAM No. 054951, 054952); Solstein Kette, Thaurer Joch, SW, 880 m, 25 May 1898, *B. Kotula s.n.* (KRAM No. 054948); Solstein Kette, Taur, 22 May 1895, *B. Kotula s.n.* (KRAM No. 054957); Solstein Kette, Rum, 780 m, 25 May 1898, *B. Kotula s.n.* (KRAM No. 054956); Solstein Kette, Garzantal, 815 m, 01 June 1898, *B. Kotula s.n.* (KRAM No. 054972); Solstein Kette, Haller Tal, 915 m, 17 June 1897, *B. Kotula s.n.* (KRAM No. 054969); Solstein Kette, Gleiersch, 1655 m, 20 September 1894, *B. Kotula s.n.* (KRAM No. 054971); Solstein Kette, Grosser Achselkopf, SSW, 2260 m, 14 November 1897, *B. Kotula s.n.* (KRAM No. 054970); Hinterautal, 1120 m, lewy brzeg doliny, 30 June 1897, *B. Kotula s.n.* (KRAM No. 055054); Hinterautal, 1240 m, 01 July 1897, *B. Kotula s.n.* (KRAM No. 055053); Hinterautal, 1520 m, 01 July 1897, *B. Kotula s.n.* (KRAM No. 054935); Pinnis Kette, Serles, 02 August 1894, *B. Kotula s.n.* (KRAM No. 054945, 054949); Pinnis Kette, Kesselspitz, 11 August 1895, *B. Kotula s.n.* (KRAM No. 054947); Rosenjoch Kette, […], 25 August 1895, *B. Kotula s.n.* (KRAM No. 054937, 054938); Rosenjoch Kette, Sonnenspitze, 1980 m, 22 July 1894, *B. Kotula s.n.* (KRAM No. 054940); **Vorarlberg state:** le long de la RN 200, un peu à l’W. de Warth, alt. 1500 m, 22 July 1960, *G. Didier 3149* (P barcode P05037020 [digital image])*; **CZECH REPUBLIC.** **Ústí nad Labem region:** na stepowych miejscach na bazalcie góry Hradiště, Hlinná, pow. Litoměřice, 04 August 1958, *J. Mądalski 20638* (KRAM No. 497095); **Prague:** in acclivibus apricis pr. v. Prokop ad urbem Pragum, 18 June 1898, *J. Podpera s.n.* (LW No. 114159); v. Prokopsk [?], 12 July 1883, *J. Velenovský s.n.* (CHER)*; Prag, auf sonnigen Plätzen, s.d., *[?]* *s.n.* (LW No. 115335); Praha, “Hromovka”, 1942, *[?] s.n.* (BRA); v Kopcich, Prague, 24 July 1883, *J. Velenovský s.n.* (CHER); Prosik, June 1841, *P. Opiz s.n.* (PRC barcode PRC 454070 [digital image])*; na výslunné, kamenité strain, Prosek – Praha, 300 m n.m., 16 May 1949, *H. Zavřel s.n.* (BRA); Scharka, 06 August 1832, *P. Opiz s.n.* (PRC barcode PRC 454068 [digital image])*; Radotín pod Pragą, 04 June 1924, *A. Kozłowska s.n.* (KRAM No. 038743); Radotín – Lochkov ad urbem Praha, in stepposis, solo calc., 07 June 1924, *B. Pawłowski s.n.* (KRAM No. 332613, 332614, 332681); **Central Bohemian region:** Karlova Týna, 03 June 1883, *Klapólska s.n.* (LW No. 115337); unweit Srbsko im Kačak[s]tal, 15 September 1916, *s.c.* (CHER); **Vysočina region:** Mohelno k. Brna, na serpentynach nad Igławą, 01 June 1928, *K. Piech s.n.* (KRAM No. 184114, 184115); Mohelno, hadcová step, 19 June 1937, *F. Nábĕlek s.n.* (SAV); na podłożu i na skałach serpentynowych nad rzeką Jihlavką, Mohelno, pow. Velká Bíteš, 24 July 1958, *J. Mądalski 20416* (KRAM No. 497091, 497092, 497093, 497094); **South Moravian region:** Moravia, Znaim, 23 May 1894, *A. Oborny s.n.* (LW No. 115327); Moravia, Znaim, 10 June 1897, *A. Oborny s.n.* (LW No. 115328, 115329); Znojmo, 289 m n.m., 15 July s.a., *s.c.* (BRA); Mor. Krumlov, Vémyslice, stepní svahy kopečku zv. “Na vartě”, ca. 320 m, 18 May 1974, *J. Dvořák s.n.* (BRA)*; Plenkovice, na stróni, 29 April 1963, *Přibilová s.n.* (BRA); na stepním pahorku, Šibičník u Bohutic (okres Znojmo), 300 m n.m., 16 June 1957, *H. Zavřel s.n.* (BRA); Auerschitz, 17 May 1888, *[?] s.n.* (BRA); Moravia, Heil.[iger] Berg b. Nikolsburg, May 1908, *H. Laus s.n.* (CHER; KRAM No. 015111; P barcode P04436577* [digital image]); Turoldsberg bei Nikolsburg, 21 May 1891, *[?] s.n.* (BRA); Tišnov, Dřínová, výpencové svahy pod vrcholem, ca. 350 m, 18 May 1971, *J. Dvořák s.n.* (BRA); Tišnov, křovité svahy na jižní straně “Dřínové”, ca. 350 m, 18 May 1971, *J. Dvořák s.n.* (BRA); Tišnov, kamenité svahy na jižní straně “Květnice”, ca. 450 m, 18 May 1971, *J. Dvořák s.n.* (BRA); Tišnov, kamenité vápencové svahy na jižní straně “Květnice”, ca. 440 m, 23 May 1972, *J. Dvořák s.n.* (BRA); Kuřim, kamenité stepní svahy pod vrcholem “Horky”, ca 320 m, 01 June 1971, *J. Dvořák s.n.* (BRA)*; Kuřim, Záruba, křovité svahy na jižní straně, ca. 300 m, 01 June 1971, *J. Dvořák s.n.* (BRA); Pálavské kopce, 19 May 1966, *[?] s.n.* (BRA); Tabulová hora – Pálava, 24 May 1969, *V. Hodoval 1829* (BRA); Pálavské kopce, svahy nad Horním Vĕstonicem, 23 May 1968, *E. Kmetʼová s.n.* (SAV); Pálavské vrchy, 25 May 1969, *V. Hodoval s.n.* (BRA); Pavlovské kopce, Kotelná hora, 250 m, 30 April 1950, *V. Kavka s.n.* (BRA); Pálavské kopce, SE svah nad obceu Pavlov, ca. 350 m s.m, 22 June 1969, *E. Kmetʼová s.n.* (SAV); Pálavské kopce, SE svahy nad obceu Pavlov, ca. 350 m s.m, 22 June 1969, *E. Kmetʼová s.n.* (SAV); Dol. Vĕstonice, pahorky,12 May 1937, *K. Ptačovský s.n.* (SAV); na kamienistym stepie na Pavlovských Kopcach, Dolní Vĕstonice, pow. Mikulov, 23 July 1958, *J. Mądalski 20364* (KRAM No. 497090); Moravské Knínice, stepní svahy pod kapličkou, ca. 310 m, 24 June 1971, *J. Dvořák s.n.* (BRA)*; Moravské Knínice, písčité svahy v bývalém písečníku u lesa, ca. 320 m, 24 June 1971, *J. Dvořák s.n.* (BRA); **Olomouc region:** Steppenabh. bei Kl. Latein, Olmütz, May 1935, *H. Laus**9739* (KRAM No. 497097, 497098); Olmütz, Kosířb. Kl. Lutín, May 1935, *H. Laus**9740*(KRAM No. 497089); **POLAND. Lesser Poland voivodeship:** Ojców, Grota Ciemna, 27 July 1929, *K. Piech s.n.* (KRAM No. 253367, 253368); Ojców, grupa skał Jaskini Ciemnej, *Festucetum pallentis*, 26 July 1962, *S. Michalik s.n.* (KRAM No. 459225, 459228); Dolina Sąspowska koło Ojcówa, czaść dolna, levy brzeg, skały wapienne, 20 June 1923, *B. Pawłowski s.n.* (KRAM No. 332615, 332679); Ojców, dol. Sąspowska, zesp. *Festucetum pallentis*, na skałach wapiennych, 16 June 1951, *A. Jasiewicz s.n.* (KRAM No. 015110)*; Ojców, dol. Sąspowska, skały wapienne o wyst. pd., 16 June 1951, *A. Jasiewicz s.n.* (KRAM No. 411748, 411749); skały wapienne w Ojcówe, June 1957, *T. Kowal s.n.* (KRAM No. 347337); Ojców, skaliste zbocza […], murawy kserotermiczne (*Origano-Brachipoidietum*), 02 August 1958, *S. Michalik s.n.* (KRAM No. 459231); Ojców, Wilcze skały, *Festucetum pallentis*, 29 May 1959, *S. Michalik s.n.* (KRAM No. 459230); Ojców, pr. zb. doliny, skały […], 10 August 1963, *S. Michalik s.n.* (KRAM No. 459227); okolice Ojcówa, Grodzisko, skaliste zbocza […], 21 August 1958, *S. Michalik s.n.* (KRAM No. 459232, 459233); okolice Ojcówa, Prądnik Korzkiewski, skały na l. zb. doliny przy zakącie potoku […], 31 July 1962, *S. Michalik s.n.* (KRAM No. 459229); okolice Ojcówa, Prądnik Korzkiewski, skały wapienne, […], 25 June 1965, *S. Michalik s.n.* (KRAM No. 459234); **SLOVAK REPUBLIC. Bratislava region:** Malé Karpaty – Pohanská hora, 30 June 1955, *T. Krippelová s.n.* (SAV); Malé Karpaty, Plavecké Podhradie, Pohanská, kota 495, xerotermné porasty, vápenec, 13 May 1993, *M. Vozárová s.n.* (BRA); Malé Karpaty, Roštún, hrebeň, 30 June 1955, *M. Jasičová s.n.* (SAV); Malé Karpaty, Čachlicky hrad, ca. 300 m s.m., 19 August 1971, *M. Jasičová, Flašíková s.n.* (SAV); Malé Karpaty, Plavecký Mikuláš, scaly na okraji cestu smerom k jask. Deravá skala, ca. 300 m, 06 August 1996, *M. Vozárová s.n.* (BRA); Malé Karpaty, Plavecké Podhradie, Barboriská, sivé dolomity, 542 m s.m., 12 June 1996, *M. Vozárová s.n.* (BRA); Devínska Kobyla, k. 514 m, stepné lúky nad Devínom, 23 May 1967, *E. Pecniková s.n.* (BRA); Devínska Kobyla, 20 May 1968, *E. Kmetʼová s.n.* (SAV); Devínska Kobyla, 03 Junq 1968, *V. Hodoval s.n.* (BRA); jižní svahy Děvínské Kobyly, ca. 400 m, 21 May 1972, *J. Dvořák s.n.* (BRA); Devínska Kobyla, lesostep, vápence, exp. JZ, 300 m s.m., 27 May 1970, *J. Hajduk s.n.* (BRA); Devínska Kobyla, Sandberg, 01 August 1974, *s.c. 1822* (BRA); Devínska Kobyla, 20 September 1962, *M. Kaleta s.n.* (BRA); Devín, Devínska Kobyla, JZ svahy nad obcou, xerotermné porasty, 514 m s.m., 13 June 1995, *M. Vozárová* *s.n.* (BRA); Devín, 23 June 1932, *E. Schidlay s.n.* (BRA); Bratislava, Petržalka, lúka s kopcovitým terénom, nedaleko žel. trare, c. 160 m s.m., 07. May 1959, *Š. Popovič s.n.* (SAV); Studienka N, 500 m od obce pri ceste smerom na Lakš. Novú Ves, 26 July 1972, *E. Kmetʼová s.n.* (SAV); **Trnava region:** Dobrá Voda, pri ceste, 17 May 1977, *K. Zahradniková s.n.* (SAV); Dobrá Voda, Marianske kvety, 17 May 1977, *K. Zahradniková s.n.* (SAV); Biele Karpaty **–** Hradište p. Vr., JJZ svah, alt. 407.0 m, vápencová bučina, 06 October 1960, *T. Krippelová s.n.* (SAV); Hradište p / Vrátnom, May 1968, *Z.Brteková s.n.* (BRA);Holý vrch pri Trstíne (dolomit), 333.8 m s.m., 04 July 1960, *T. Krippelová, M. Jasičová s.n.* (SAV); Malé Karpaty, Trstín, dolomitové skalky nad lomom, 48°32'13''N / 17°27'14''E, 253 m n.m., 19 June 2001, *M. Valachovič MV2363* (SAV); Malé Karpaty, Trstín – Buková, Biela hora – Dubník, drobivá vápencová drť, 375 m s.m., 01 August 1996, *M. Vozárová s.n.* (BRA); Malé Karpaty, […] svah Ostrého Kameňa, ca. 380 m s.m., 04 June 1958, *M. Jasičová s.n.* (SAV); Malé Karpaty, Buková, 26 August 1972, *A. Ščepka s.n.* (SAV); in declivibus meridion. montis 304 m apud pag. Plavecký St. Peter, in *Querceto pubescenti*, solo calcareo, ca. 300 m s.m., *A. Hlavaček s.n.* (SAV); **Nitra region:** Nitra, Kalvária, 05 July 1989, *M. Peniašteková,* *H. Šípošová s.n.* (SAV); Tribečské pohorie, Zobor pri Nitre, 580 m s.m., 01 June 1964, *P. T’izoň s.n.* (BRA); poh. Tribeč, vrch Včelár (c. 503) na vých. od v. Hostie, exp. SV, […], ca. 450 m s.m., 01 June 1989, *H. Šípošová s.n.* (SAV); Pohronský Inovec, Obyce, kóta Včelár, 325 m s.m., 11 May 2001, *M. Valachovič 2310* (SAV); Kováčov (Burda), 17 May 1979, *M. Peniašteková s.n.* (SAV); Kovačovské kopce, in clivo petroso supra vicum Kováčov, solo andesitico, ca. 320 m, 04 May 1977, *J. Dvořák s.n.* (BRA); Kovačovské kopce, andezitové svahy nad žel. stanicí v Kovačově, ca. 250 m, 09 May 1972, *J. Dvořák s.n.* (BRA)*; Slovens. Kr. již., Štúrovo, Kovačovské kopce, 115 m, 09 June 1950, *V. Kavka s.n.* (BRA); Slovens. Kr. již., Čenkov, na písčině ve vinici, 110 m, 06 May 1950, *V. Kavka s.n.* (BRA); Kováčovské kopce, exp. juh, ca. 200 m s.m., 28 May 1992, *H. Šípošová, K. Goliášová s.n.* (SAV); Šahanské kopce, Šípka pri Pláštʼovcach, *Festucetum pseudodalmaticae*, c. 280 m s.m., 26 May 1956, *J. Michalko s.n.* (SAV); in saxosis jugi m. Vápenníc et Žibrica prope p. Kolíňany, solo dolomitico, 530 m s.m., 12 May 1972, *A. Hlavaček s.n.* (SAV); Čelʼadince, vrch Hrdovická (Hradovičká, 470.1), xeroterm. lúčka na Z. úpódti vrchu, ca. 280 s.m., 06 July 1994, *H. Šípošová s.n.* (SAV); Topolʼčanske Podhradie, záhrada, 28 May 1991, *M. Peniašteková, H. Šípošová s.n.* (SAV); Považský Inovec, Závada, […], 210 m s.m., 31 May 1990, *H. Šípošová, M. Peniašteková s.n.* (SAV); **Banská Bystrica region:** góra Jamki ad Banska Bistrica, skaliste i trawiaste miejsća, 300–500 m n.p.m., 05 July 1958, *S. Pawłowska, B. Pawłowski s.n.* (KRAM No. 038742, 332677, 332678); lúky medzi Tajovem a Riečkou, V od vrchu Sokolieva (h. 873 m), ca. 550 m s.m., 13 May 1989, *H. Šípošová s.n.* (SAV); Sitno, 16 July 1933, *V. Nábĕlek s.n.* (SAV); Sitno – B. Štiavnicá, 1010 m, 16 July 1933, *V. Nábĕlek s.n.* (SAV)*; Štiavnické vrchy, Sitno, vrchol, v škárach andezitových brál, 1009 m n.m., 02 June 1969, *M. Horváthová s.n.* (BRA); Jelšavská Teplica – Muteň, lesostep, 11 April 1977, *Kliment s.n.* (SAV); Jelšavská Teplica – Muteň, lesostep, 01 May 1977, *Kliment s.n.* (SAV); Gemerské rudohorie, J svah vrchu Dúbrava na S od obce Jelšavy, 480 m s.m., 23 May 1971, *A. Gallo s.n.* (BRA); Kremnické vrchy, Boky nad Hronskou Dúbravou, 340 m s.m., 30 May 2001, *M. Valachovič 2350* (SAV); Iʼpelšká kotlina, Dolná Strehová, lok. Dedinská hora, 250 m s.m., 27 June 1996, *M. Valachovič s.n.* (SAV); **Trenčín region:** o. Bánovce n. B., […], *Caricetum humilis,* ca. 550 m s.m., 12 July 1960, *J. Futák s.n.* (SAV); o. Bánovce n. B., skupina Rokoša, Zrubiská pod Uhrov. Podhradie, dolomit, ca. 500 m s.m., 12 July 1960, *J. Futák s.n.* (SAV); o. Bánovce n. B., skupina Košútova skala, *Caricetum humilis* na východe, exp. S, dolomit, ca. 500 m s.m., 14 July 1960, *J. Futák s.n.* (SAV); o. Bánovce n. B., skupina Rokoša, […] pod Uhrov. Podhradie, dolomit, ca. 700 m s.m., 15 July 1960, *J. Futák s.n.* (SAV); Stráž. hornatina, skupina Rokoša, stráne za Dol. Vestenicami (smer Uhrovec), dolomit, 21 May 1964, *J. Futák, O. Hubová s.n.* (SAV); Strážovská hornatina, Uhrovské Podhradie, […], dolomit, ca. 580 m s.m., 22 August 1961, *J. Futák s.n.* (SAV); Uhrovec, cestou na j., vrch pri okraji cesty, 400 m s.m., 04 June 1991, *M. Valachovič s.n.* (SAV); Uhrovec, Jankov vršok, stepní svahy na “Srnčie lúčke”, exposice severovýchodní, ca. 500 m, 13 June 1979, *J. Dvořák s.n.* (BRA); o. Bánovce n. B., Jankov vrch pri Trenčianských Miticach, dolomit, ca. 300 m s.m., 17 July 1960, *J. Futák s.n.* (SAV); o. Bánovce n. B., kóta 442, svah Drieňovca pod Timoradza, *Festuca pallens – Carex humilis*, exp. S, dolomit, ca. 440 m s.m., 14 July, 1960, *J. Futák s.n.* (SAV); Hornie ponitrie, Nitrianské Rudno, travnaté svahy nedaleko lomu a továrny, ca. 540 m, 12 May 1977, *J. Dvořák s.n.* (BRA); Horní Ponitří, Nitrianské Rudno, travnatý svah na basi kopce poblíž nové továrny, ca. 420 m, 13 May 1977, *J. Dvořák s.n.* (BRA); Hornie ponitrie, kamenité svahy nad lomem mezi obcí Šútovce a autocampingem, ca. 530 m, 12 May 1977, *J. Dvořák s.n.* (BRA); Hornie ponitrie, Dlžín, vápencové skalky v bočním údolí nad salaší, ca. 500 m, 13 May 1977, *J. Dvořák s.n.* (BRA); Bojnice, dolomitový kopeček nad starým lomem poblíž obce Dlžín, ca. 480 m, 11 May 1977, *J. Dvořák s.n.* (BRA)*; Bojnice, dolomitový kopeček při silnici nad vesnicí Dlžín, ca. 480 m, 11 May 1977, *J. Dvořák s.n.* (BRA); Horní ponitří, Diviaky nad Nitricou, křovité vápencové svahy pod kotou 561, jihozápadně od obce, ca. 490 m, 24 May 1978, *J. Dvořák s.n.* (BRA); Strážovská hornatina, Veľké Košecke Podhradie, dolina [?], dolomitové skalné svahy, ca. 500 m s.m., 23 June 1962, *J. Futák s.n.* (SAV); Strážovská hornatina, Podhradská dolina, […], ca. 450 m s.m., 09 May 1961, *J. Futák s.n.* (SAV); Strážovská hornatina, Podhradská dolina, dolomitové svahy, […], exp. juh, ca. 400 m s.m., 21 June 1962, *J. Futák s.n.* (SAV); Strážovská hornatina, obec Podhradie, […], dolomit, ca. 400 m s.m., 20 June 1962, *J. Futák s.n.* (SAV); Strážovská hornatina, svahy […] pri obce Pravotice, exp. juh, dolomit, ca. 380 m s.m., 06 September 1962, *J. Futák s.n.* (SAV); […] na Jankovom vŕšku na východ od Uhrovca, exp. juh, ca. 420 s.m., 21 September 1960, *J. Futák s.n.* (SAV); o. Bánovce n. B., Udrina na vých. od Timoradze, exp. juh, […] (*Festuca glauca – Carex humilis*), ca. 500 m s.m., 14 May 1960, *J. Futák s.n.* (SAV); Tribeč, kóta 283,6 (Sútecká), SW od obce Malé Uherce, SW svah, nad kamenolomom, 21 May 1974, *Kováčiková s.n.* (SAV)*; Strážovská hornatina, vrch Trudovač pri obce Podskalie, SE, *Caricetum humilis*, dolomit, ca. 360 m s.m., 06 September 1962, *J. Futák s.n.* (SAV); Strážovská hornatina, Podskalie SE, vrch Trudovač (h. 554.0), S. svah, na okrajú cesty, ca. 400 m s.m., 06 June 1977, *H. Šípošová s.n.* (SAV); Strážovská hornatina, Vápeč, June 1963, *M. Kaleta s.n.* (BRA)*; Vršatec, pri hotele pri hradskej, záp. svah, c. 740 m s.m., 04 October 1964, *E. Schidlay s.n.* (SAV); Čachtický hrad, 12 July 1899, *J. Holuby s.n.* (BRA); Čachtice, hrad, 08 June 1947, *F. Nábĕlek s.n.* (SAV); Čachtice, na skalách poblíž zříceniny, 19 May 1930, *F. Weber s.n.* (BRA); in collibus dolomiticus Čachtické vrchy supra pag. Višňové, 20 May 1954, *F. Weber s.n.* (P barcodes P03556747*, P04060807 [digital images]); ad arcem Tematín, 05 July 1899, *J. Holuby s.n.* (BRA); Považský Inovec, Hrádok – Tematín, 21 August 1963, *Š. Maglocký s.n.* (SAV); Považský Inovec, Bezovec, 10 June 1965, *Š. Maglocký s.n.* (SAV); Tribečské pohorie, Velʼké Bielice, váp. skala na lʼavom brehu Nitry, ca. 200 m s.m., 21 May 1964, *J. Futák, O. Hubová s.n.* (SAV); Poh. Tribeč, o. Velʼké Uherce j-v, sutinový dolomite, jz. svah Čierneho vrchu (alt. 440 m), ca. 300 m s.m., 04 August 1990, *H. Šípošová s.n.* (SAV); Rudník, 01 June 1977, *N. Goliašová s.n.* (SAV); Malé Karpaty, Brezová pod Bradlom, vypalény dolomitový svah s náletom *Pinus nigra,* 48°39'28''N / 17°33'51''E, 280 m n.m., 16 May 2001, *M. Valachovič MV2315* (SAV); **Žilina region:** Strážovská hornatina, Súlʼovské skaly, 05 June 1977, *H. Šípošová, Fatianková, Francová s.n.* (SAV)*; Strážovská hornatina, Proskovec pri obci Lietava, *Seslerietum*, vápence, J., ca. 450 m s.m., 16 July 1963, *J. Michalko s.n.* (SAV); Velʼ. Fatra, dolomit. skaly SV od Kr. Študne, c. 500 m s.m., 29 June 1972, *J. Michalko s.n.* (SAV); obec Necpaly, Necpalská dolina, okraj lesa (V. Fatra), ca. 530–540 m s.m., 05 July 1996, *H. Šípošová s.n.* (SAV); Turčianske Teplice – Háj, ostrovček póvodnej xerotermnej vegetácii, 11 June 1992, *H. Šípošová s.n.* (SAV); Vrátna dolina, 24 July 1896, *Brancsik s.n.* (BRA); Vrátna dolina, Tiesňavy, 05 June 1968, *J. Futák, K. Zahradníková s.n.* (SAV); Lʼubochňa, Vysoký grúň, 23 June 1963, *J. Futák, M. Jasičová s.n.* (SAV); **Prešov region:** unter dem Drechslerhäuschen, 07 August 1892, *J. Ullepitsch s.n.* (LW No. 115330); Pieniny, Haligovské skaly, ca. 700 m s.m., 28 July 1962, *J. Futák s.n.* (SAV); Pieniny, Haligovské skaly, pri Aksamitke, 48°23'19''N / 20°27'17''E, 747 m n.m., 19 July 2001, *M. Valachovič MV2410* (SAV); na trawertynach obok źródeł trawertynowych, 560 m n.p.m., Sivá Brada, pow. Levoča, 10 July 1958, *J. Mądalski 20119* (KRAM No. 332676, 497057, 497096*); Sivá Brada pri Spišskom Podhradí, 20 July 1984, *L. Mucina s.n.* (SAV); Spišská kotlina, Sivá Brada, J svah travertínovej kopy, spol. s *Carex humilis*, 20 July 1984, *L. Mucina LM 2969* (SAV); Spišské Podhradie, Sivá Brada, 13 September 1991, *M. Peniašteková s.n.* (SAV); Spišské kotliny, Sivá Brada (xerotermy), 03 June 1997, *Marciová* *s.n.* (SAV); **Košice region:** Slanské vrchy, s.d., *Berta s.n.* (SAV); Pohornádí, vrch Humenec, JV od Malé Lodiny, vápencové svahy na jižní straně, ca. 500 m, 25 May 1979, *J. Dvořák s.n.* (BRA); Slovenský Kras, Zádielska dolina, 18 June 1956, *J. Futák s.n.* (SAV); Slov. kras, Turniansky hrad, 14 May 1981, *E. Kmetʼová s.n.* (SAV); **HUNGARY:** [?], May 1879, *J. Fleischer s.n.* (LW No. 115336); **Komárom-Esztergom county:** Pohoří Pilis, vápencové skály Ketágú-hegy severně od osady Kesztölc, ca. 350 m, 06 May 1972, *J. Dvořák s.n.* (BRA); Pohoří Pilis, JV okraje skal pod vrcholem Pilis, 07 May 1972, *J. Dvořák s.n.* (BRA)*; Pohoří Gerecse, Nagy-Pisznice, skalnatá vápencová ostrožna JV od vrcholu, ca. 500 m, 06 May 1972, *J. Dvořák s.n.* (BRA); **Veszprém county:** Sümeg, 10 August 1894, *R. Szép s.n.* (BRA); **Fejér county:** Vertéšske kopce, kamenité stepní svahy nad obcí Csákberény, ca. 350 m, 12 May 1969, *J. Dvořák s.n.* (BRA); **Baranya county:** in rupestribus montis Harsányhegy prope Villány, 16 May 1907, *S. Konis s.n.* ut “*Thymus jankae*”(BP No.233700); **Pest county:** in declivibus supra pagum Szt.-Iván, 22 May 1909, *A. Degen s.n.* (KRAM No. 015112)*; Pilisz, Nagyszenas, 47°35'19''N / 18°52'12''E, 508 m n.m., 29 May 2002, *M. Valachovič MV2487* (SAV); **Budapest:** in collibus arenosis ad Aquincum, 23 May 1889, *C. Czakó s.n.* (SAV); in monte Hármashatár hegy ad Budapestinum, 20 May 1920, *A. Degen s.n.* (BRA); **Borsod-Abaúj-Zemplén county:** Góry Bükk, Sengyet novengei, June 1927, *A. Kozłowska s.n.* (KRAM No. 055243).
